# Supplementary material for: Syringaresinol Alleviates Oxaliplatin-Induced Neuropathic Pain Symptoms by Inhibiting the Inflammatory Responses of Spinal Microglia
Source: MDPI journal article supplement (doi:10.3390/molecules27238138), 2022-11-23
Supplement: s1 [file s1]

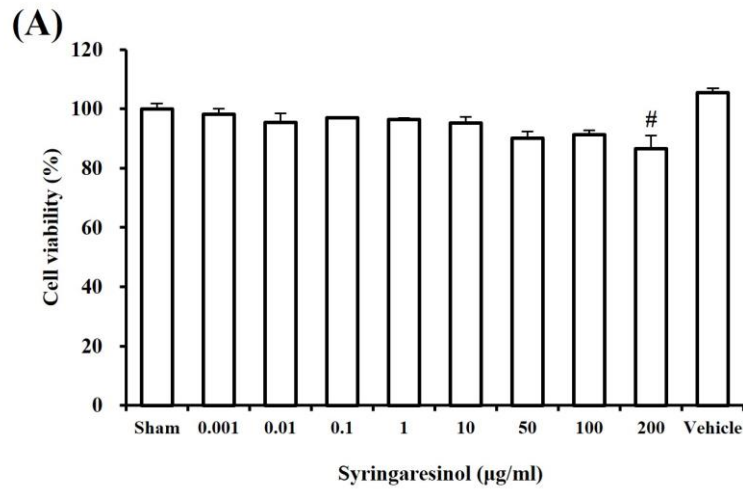

**Supplementary Figure S1.** MTT assay to evaluate the cell viability of BV-2 cells. (A) MTT assay showed that treatment of syringaresinol with a concentration of 200 µg/mL could be cytotoxic. #  $p < 0.05$  compared to sham control.
